# Supplementary material
Source: PubMed Central journal article supplement (PMC3922894)
Supplement: NIHMS513038-supplement-01.pdf [file NIHMS513038-supplement-01.pdf]

1  
2  
3  
4 Supplement 1.  
5  
6  
7

8  
9 Boolean Search Terms  
10

11 ((implementation OR dissemination OR fidelity OR adherence OR diffusion OR adoption OR  
12 sustainability OR sustainment) AND (mental health OR mental illness OR mental disorders OR  
13 psychopathology OR adjustment disorders OR anxiety disorders OR agoraphobia OR panic  
14 disorder OR phobia OR posttraumatic stress disorder OR trauma OR abuse OR neglect OR  
15 generalized anxiety disorder OR obsessive compulsive disorder OR reactive attachment disorder  
16 OR separation anxiety disorder OR eating disorder OR anorexia nervosa OR bulimia OR  
17 attention deficit hyperactivity disorder OR conduct disorder OR oppositional defiant disorder OR  
18 depression OR depressive disorder OR bipolar disorder OR mania OR dysthymic disorder OR  
19 substance use disorder OR alcohol dependence OR drug dependence OR cannabis dependence  
20 OR marijuana dependence OR nicotine dependence OR intoxication OR withdrawal OR autistic  
21 disorder OR asperger's disorder OR pervasive developmental disorder OR tic disorder OR  
22 tourette's disorder OR schizophrenia OR psychotic disorder OR mental retardation OR learning  
23 disorder OR reading disorder OR dyslexia OR mathematics disorder OR disorder written  
24 expression OR developmental coordination disorder OR expressive language disorder OR mixed  
25 receptive-expressive language disorder OR phonological disorder OR stuttering OR encopresis  
26 OR enuresis OR delirium OR personality disorder) AND (child OR adolescent OR adolescence  
27 OR children OR youth OR youths) AND NOT (diffusion tensor))  
28  
29  
30  
31  
32  
33  
34  
35  
36  
37  
38  
39  
40  
41  
42  
43  
44  
45  
46  
47  
48  
49  
50  
51  
52  
53  
54  
55  
56  
57  
58  
59  
60  
61  
62  
63  
64  
65

Table S1. Preferred Reporting Items for Systematic Reviews and Meta-Analyses (PRISMA) Systematic Review Checklist<sup>1</sup>

| Section/topic             | #  | Checklist item                                                                                                                                                                                                                                                                                              | Reported on page # |
|---------------------------|----|-------------------------------------------------------------------------------------------------------------------------------------------------------------------------------------------------------------------------------------------------------------------------------------------------------------|--------------------|
| <b>TITLE</b>              |    |                                                                                                                                                                                                                                                                                                             |                    |
| Title                     | 1  | Identify the report as a systematic review, meta-analysis, or both.                                                                                                                                                                                                                                         | X                  |
| <b>ABSTRACT</b>           |    |                                                                                                                                                                                                                                                                                                             |                    |
| Structured summary        | 2  | Provide a structured summary including, as applicable: background; objectives; data sources; study eligibility criteria, participants, and interventions; study appraisal and synthesis methods; results; limitations; conclusions and implications of key findings; systematic review registration number. | X                  |
| <b>INTRODUCTION</b>       |    |                                                                                                                                                                                                                                                                                                             |                    |
| Rationale                 | 3  | Describe the rationale for the review in the context of what is already known.                                                                                                                                                                                                                              | X                  |
| Objectives                | 4  | Provide an explicit statement of questions being addressed with reference to participants, interventions, comparisons, outcomes, and study design (PICOS).                                                                                                                                                  | X                  |
| <b>METHODS</b>            |    |                                                                                                                                                                                                                                                                                                             |                    |
| Protocol and registration | 5  | Indicate if a review protocol exists, if and where it can be accessed (e.g., Web address), and, if available, provide registration information including registration number.                                                                                                                               | N/A                |
| Eligibility criteria      | 6  | Specify study characteristics (e.g., PICOS, length of follow-up) and report characteristics (e.g., years considered, language, publication status) used as criteria for eligibility, giving rationale.                                                                                                      | X                  |
| Information sources       | 7  | Describe all information sources (e.g., databases with dates of coverage, contact with study authors to identify additional studies) in the search and date last searched.                                                                                                                                  | X                  |
| Search                    | 8  | Present full electronic search strategy for at least one database, including any limits used, such that it could be repeated.                                                                                                                                                                               | X                  |
| Study selection           | 9  | State the process for selecting studies (i.e., screening, eligibility, included in systematic review, and, if applicable, included in the meta-analysis).                                                                                                                                                   | X                  |
| Data collection process   | 10 | Describe method of data extraction from reports (e.g., piloted forms, independently, in duplicate) and any processes for obtaining and confirming data from investigators.                                                                                                                                  | X                  |
| Data items                | 11 | List and define all variables for which data were sought (e.g., PICOS, funding sources) and any assumptions and simplifications made.                                                                                                                                                                       | X                  |

1  
2  
3  
4  
5  
6  
7  
8  
9  
10  
11  
12  
13  
14  
15  
16  
17  
18  
19  
20  
21  
22  
23  
24  
25  
26  
27  
28  
29  
30  
31  
32  
33  
34  
35  
36  
37  
38  
39  
40  
41  
42  
43  
44  
45  
46  
47  
48  
49  
50  
51  
52  
53  
54  
55  
56  
57  
58  
59  
60  
61  
62  
63  
64  
65

| Section/topic                      | #  | Checklist item                                                                                                                                                                                                         | Reported on page # |
|------------------------------------|----|------------------------------------------------------------------------------------------------------------------------------------------------------------------------------------------------------------------------|--------------------|
| Risk of bias in individual studies | 12 | Describe methods used for assessing risk of bias of individual studies (including specification of whether this was done at the study or outcome level), and how this information is to be used in any data synthesis. | N/A                |
| Summary measures                   | 13 | State the principal summary measures (e.g., risk ratio, difference in means).                                                                                                                                          | N/A                |
| Synthesis of results               | 14 | Describe the methods of handling data and combining results of studies, if done, including measures of consistency (e.g., I <sup>2</sup> for each meta-analysis).                                                      | N/A                |
| Risk of bias across studies        | 15 | Specify any assessment of risk of bias that may affect the cumulative evidence (e.g., publication bias, selective reporting within studies).                                                                           | N/A                |
| Additional analyses                | 16 | Describe methods of additional analyses (e.g., sensitivity or subgroup analyses, meta-regression), if done, indicating which were pre-specified.                                                                       | N/A                |
| <b>RESULTS</b>                     |    |                                                                                                                                                                                                                        |                    |
| Study selection                    | 17 | Give numbers of studies screened, assessed for eligibility, and included in the review, with reasons for exclusions at each stage, ideally with a flow diagram.                                                        | X                  |
| Study characteristics              | 18 | For each study, present characteristics for which data were extracted (e.g., study size, PICOS, follow-up period) and provide the citations.                                                                           | X                  |
| Risk of bias within studies        | 19 | Present data on risk of bias of each study and, if available, any outcome level assessment (see item 12).                                                                                                              | N/A                |
| Results of individual studies      | 20 | For all outcomes considered (benefits or harms), present, for each study: (a) simple summary data for each intervention group (b) effect estimates and confidence intervals, ideally with a forest plot.               | N/A                |
| Synthesis of results               | 21 | Present results of each meta-analysis done, including confidence intervals and measures of consistency.                                                                                                                | N/A                |
| Risk of bias across studies        | 22 | Present results of any assessment of risk of bias across studies (see Item 15).                                                                                                                                        | N/A                |

1  
2  
3  
4  
5  
6  
7  
8  
9  
10  
11  
12  
13  
14  
15  
16  
17  
18  
19  
20  
21  
22  
23  
24  
25  
26  
27  
28  
29  
30  
31  
32  
33  
34  
35  
36  
37  
38  
39  
40  
41  
42  
43  
44  
45  
46  
47  
48  
49  
50  
51  
52  
53  
54  
55  
56  
57  
58  
59  
60  
61  
62  
63  
64  
65

| Section/topic               | #  | Checklist item                                                                                                                                                                       | Reported on page # |
|-----------------------------|----|--------------------------------------------------------------------------------------------------------------------------------------------------------------------------------------|--------------------|
| Additional analysis         | 23 | Give results of additional analyses, if done (e.g., sensitivity or subgroup analyses, meta-regression [see Item 16]).                                                                | N/A                |
| <b>DISCUSSION</b>           |    |                                                                                                                                                                                      |                    |
| Summary of evidence         | 24 | Summarize the main findings including the strength of evidence for each main outcome; consider their relevance to key groups (e.g., healthcare providers, users, and policy makers). | X                  |
| Limitations                 | 25 | Discuss limitations at study and outcome level (e.g., risk of bias), and at review-level (e.g., incomplete retrieval of identified research, reporting bias).                        | X                  |
| Conclusions                 | 26 | Provide a general interpretation of the results in the context of other evidence, and implications for future research.                                                              | X                  |
| <b>FUNDING</b>              |    |                                                                                                                                                                                      |                    |
| Funding                     | 27 | Describe sources of funding for the systematic review and other support (e.g., supply of data); role of funders for the systematic review.                                           | X                  |
| Risk of bias across studies | 15 | Specify any assessment of risk of bias that may affect the cumulative evidence (e.g., publication bias, selective reporting within studies).                                         | N/A                |

1  
2  
3  
4  
5  
6  
7  
8  
9  
10  
11  
12  
13  
14  
15  
16  
17  
18  
19  
20  
21  
22  
23  
24  
25  
26  
27  
28  
29  
30  
31  
32  
33  
34  
35  
36  
37  
38  
39  
40  
41  
42  
43  
44  
45  
46  
47  
48  
49

**Table 2S. Summary of Studies of Evidence-Based Practice (EBP) Dissemination and Implementation in Youth Mental Health**

| Paper                                                                                                                                                                                                                                                                                                                             | EPIS Stage                 | Prevention / Treatment | Treatment/ Practice Studied | Treatment/ Practice Setting | Contextual Focus                                                                    | Intervention                                                                   | Research Design                            | Unit(s) of Analysis                                                                                  | n      |
|-----------------------------------------------------------------------------------------------------------------------------------------------------------------------------------------------------------------------------------------------------------------------------------------------------------------------------------|----------------------------|------------------------|-----------------------------|-----------------------------|-------------------------------------------------------------------------------------|--------------------------------------------------------------------------------|--------------------------------------------|------------------------------------------------------------------------------------------------------|--------|
| Aarons and Sawitzky, 2006 <sup>2</sup>                                                                                                                                                                                                                                                                                            | Preparation                | Treatment              | Multiple                    | Mental health clinics       | Inner (organizational-culture/climate)                                              | None                                                                           | Descriptive-quantitative (provider survey) | Multiple-provider, mental health programs                                                            | 301/49 |
| <b>Summary:</b> Constructive organizational culture was associated with more positive attitudes towards EBP adoption, while poor organizational climates (Defensive) was associated with perceived divergence of usual practice and EBP. Interns reported more positive attitudes towards EBPs than employees.                    |                            |                        |                             |                             |                                                                                     |                                                                                |                                            |                                                                                                      |        |
| Aarons et al., 2009 <sup>3</sup>                                                                                                                                                                                                                                                                                                  | Implementation             | Prevention             | SafeCare                    | Home-based (Child welfare)  | Inner (organizational; provider; fidelity)                                          | 2x2 RCT: Safecare versus care as usual x fidelity monitoring vs. no monitoring | RCT                                        | Multi-organization, provider (organization dropped from final analyses)                              | 153/25 |
| <b>Summary:</b> In multivariate model analyses, Safecare plus fidelity monitoring had higher staff retention rates than Safecare plus no monitoring. Older age, greater perceived job autonomy, and lower expressed intention to leave their job also positively correlated with higher staff retention rates.                    |                            |                        |                             |                             |                                                                                     |                                                                                |                                            |                                                                                                      |        |
| Aarons et al., 2009 <sup>4</sup>                                                                                                                                                                                                                                                                                                  | Implementation Sustainment | Prevention             | SafeCare                    | Child welfare               | Inner (organizational; provider; fidelity; coaching)                                | 2x2 RCT: Safecare versus care as usual x fidelity monitoring vs. no monitoring | RCT                                        | Multiple-agencies/providers (analyses Were conducted to address clustering of providers in programs) | 21/99  |
| <b>Summary:</b> Providers in programs implementing Safecare had lower levels of emotional exhaustion. Significant predictors of emotional exhaustion included age (older=less emotional exhaustion) and caseload (higher=greater emotional exhaustion).                                                                           |                            |                        |                             |                             |                                                                                     |                                                                                |                                            |                                                                                                      |        |
| Aarons et al., 2009 <sup>5</sup>                                                                                                                                                                                                                                                                                                  | Preparation Implementation | Treatment              | Multiple                    | Mental health clinics       | Outer (sociopolitical; funding; consumer), Inner (adopter; organizational; EBP fit) | None                                                                           | Descriptive-qualitative (focus groups)     | Single-Focus Group                                                                                   | 6      |
| <b>Summary:</b> Analyses identified 14 factors/dimensions important for the adoption and implementation of EBPs in public mental health services. These factors include inner (adopter characteristics) and outer contexts (funding and costs) as well as characteristics of the intervention itself.                             |                            |                        |                             |                             |                                                                                     |                                                                                |                                            |                                                                                                      |        |
| Aarons, and Palinkas, 2007 <sup>6</sup>                                                                                                                                                                                                                                                                                           | Implementation Sustainment | Prevention             | SafeCare                    | Child welfare               | Inner (organizational-leadership; EBP fit) Outcomes (family)                        | None                                                                           | Descriptive-qualitative                    | Single-case managers                                                                                 | 17     |
| <b>Summary:</b> Critical determinants of EBP implementation included acceptability to the caseworker and family, suitability to the family's needs, caseworker motivations for using the EBP, training experiences with the EBP, organizational support for implementation, and the EBP's impact on process and service outcomes. |                            |                        |                             |                             |                                                                                     |                                                                                |                                            |                                                                                                      |        |
| Aarons, 2006 <sup>7</sup>                                                                                                                                                                                                                                                                                                         | Preparation                | Treatment              | Multiple                    | Mental health clinics       | Inner (organizational-leadership; provider)                                         | None                                                                           | Descriptive-quantitative (provider survey) | Multiple-provider, mental health programs                                                            | 303/49 |
| <b>Summary:</b> Higher ratings of supervisors' transformational and transactional leadership skills were associated with positive attitudes towards EBPs. Interns and individuals with shorter job tenures had more positive attitudes towards EBPs.                                                                              |                            |                        |                             |                             |                                                                                     |                                                                                |                                            |                                                                                                      |        |

1  
2  
3  
4  
5  
6  
7  
8  
9  
10  
11  
12  
13  
14  
15  
16  
17  
18  
19  
20  
21  
22  
23  
24  
25  
26  
27  
28  
29  
30  
31  
32  
33  
34  
35  
36  
37  
38  
39  
40  
41  
42  
43  
44  
45  
46  
47  
48  
49

|                                                                                                                                                                                                                                                                                                                                               |                            |            |                                     |                                              |                                                                           |                                                                                                                           |                                                              |                                                                                                     |             |
|-----------------------------------------------------------------------------------------------------------------------------------------------------------------------------------------------------------------------------------------------------------------------------------------------------------------------------------------------|----------------------------|------------|-------------------------------------|----------------------------------------------|---------------------------------------------------------------------------|---------------------------------------------------------------------------------------------------------------------------|--------------------------------------------------------------|-----------------------------------------------------------------------------------------------------|-------------|
| Asgary-Eden and Lee 2011 <sup>8</sup>                                                                                                                                                                                                                                                                                                         | Preparation Implementation | Prevention | Triple P-Positive Parenting Program | Mental health clinics                        | Outer (training), Inner (organizational-climate, leadership)              | Impacts of a prior training effort                                                                                        | Descriptive-quantitative (provider and administrator survey) | Multiple -administrator, provider (analyzed separately)                                             | 113/214     |
| <b>Summary:</b> 70% of the trained service providers delivered the intervention with an average adherence percentage of 86%. No variables predicted intervention use, but agency characteristics (organizational climate, staff characteristics, supervisor characteristics) predicted greater implementation fidelity.                       |                            |            |                                     |                                              |                                                                           |                                                                                                                           |                                                              |                                                                                                     |             |
| Asgary-Eden and Lee 2011 <sup>9</sup>                                                                                                                                                                                                                                                                                                         | Preparation Implementation | Prevention | Triple P-Positive Parenting Program | Mental health clinics                        | Intervention, Outer (sociopolitical), Inner (organizational)              | Impacts of a prior training effort                                                                                        | Descriptive-quantitative (provider and administrator survey) | Multiple -administrator, provider (analyzed separately)                                             | 63/215      |
| <b>Summary:</b> Similar to companion paper, most programs adopted the program but a significant minority did not (26%). Adherence rates were very high (86%). Perceived time limitations or lack of relevance of intervention to certain activities were associated with non-adherence.                                                       |                            |            |                                     |                                              |                                                                           |                                                                                                                           |                                                              |                                                                                                     |             |
| Barwick et al., 2009 <sup>10</sup>                                                                                                                                                                                                                                                                                                            | Implementation             | Treatment  | CAFAS                               | Mental health clinics                        | Inner (organizational)                                                    | Use of a community of practice approach for improving adherence to use of the CAFAS                                       | RCT                                                          | Single - provider (randomization was done by organization, which was not addressed in the analysis) | 37/(6)      |
| <b>Summary:</b> Providers working in organizations using a Community of Practice implementation model had higher rates CAFAS use; their knowledge regarding the CAFAS increased over time while those in the Practice as Usual programs decreased.                                                                                            |                            |            |                                     |                                              |                                                                           |                                                                                                                           |                                                              |                                                                                                     |             |
| Beidas et al., 2012 <sup>11</sup>                                                                                                                                                                                                                                                                                                             | Implementation             | Treatment  | CBT for anxiety                     | Mental health clinicians in private practice | Outer (training)                                                          | Three different initial training workshops (routine, computerized, and routine augmented with active learning principles) | RCT                                                          | Single - provider                                                                                   | 115         |
| <b>Summary:</b> Based on the Adherence and Skill Checklist, the three workshops did not show significant differences in adherence, skill, and knowledge; however, participants preferred the in-person over the computerized training. Follow-up played a critical role with adherence and skill but was not a part of the randomized design. |                            |            |                                     |                                              |                                                                           |                                                                                                                           |                                                              |                                                                                                     |             |
| Carstens et al. 2009 <sup>12</sup>                                                                                                                                                                                                                                                                                                            | Preparation                | Treatment  | Multisystemic Therapy               | Mental health clinics                        | Outer (sociopolitical; leadership; funding; interorganizational networks) | None                                                                                                                      | Descriptive-qualitative                                      | Single-service systems                                                                              | 13          |
| <b>Summary:</b> Alliances that adopted MST had done more system of care collaboration and planning, felt they had the financial resources to deliver MST, benefited from stronger collaborative planning activities, and described the presence of entrepreneurial leadership.                                                                |                            |            |                                     |                                              |                                                                           |                                                                                                                           |                                                              |                                                                                                     |             |
| Chapman and Schoenwald 2011 <sup>13</sup>                                                                                                                                                                                                                                                                                                     | Implementation             | Treatment  | Multisystemic Therapy               | Mental health clinics                        | Inner (provider; fidelity)                                                | None                                                                                                                      | Descriptive-Quantitative                                     | Multi-organization, provider, youth and caregiver                                                   | 1979/429/45 |
| <b>Summary:</b> Ethnically similar caregiver-therapist pairs had higher adherence ratings, which, in turn, predicted slightly better outcomes for youth.                                                                                                                                                                                      |                            |            |                                     |                                              |                                                                           |                                                                                                                           |                                                              |                                                                                                     |             |
| Chu and Kendall, 2009 <sup>14</sup>                                                                                                                                                                                                                                                                                                           | Implementation             | Treatment  | CBT for anxiety                     | Mental health clinic                         | Inner (provider; fidelity) Outcomes (patient)                             | None                                                                                                                      | Descriptive-Quantitative                                     | Single - youth (provider and clinical trial levels not addressed in analyses)                       | 63/(16)/(3) |
| <b>Summary:</b> Greater flexibility in implementing CBT was associated with greater child involvement later phases of treatment; greater child involvement was predictive of better treatment outcomes.                                                                                                                                       |                            |            |                                     |                                              |                                                                           |                                                                                                                           |                                                              |                                                                                                     |             |

1  
2  
3  
4  
5  
6  
7  
8  
9  
10  
11  
12  
13  
14  
15  
16  
17  
18  
19  
20  
21  
22  
23  
24  
25  
26  
27  
28  
29  
30  
31  
32  
33  
34  
35  
36  
37  
38  
39  
40  
41  
42  
43  
44  
45  
46  
47  
48  
49

|                                                                                                                                                                                                                                                                                                                                                                       |                                            |                               |            |                                                                      |                             |                                                              |                                                                                                                         |                                                    |                                                                                                   |             |
|-----------------------------------------------------------------------------------------------------------------------------------------------------------------------------------------------------------------------------------------------------------------------------------------------------------------------------------------------------------------------|--------------------------------------------|-------------------------------|------------|----------------------------------------------------------------------|-----------------------------|--------------------------------------------------------------|-------------------------------------------------------------------------------------------------------------------------|----------------------------------------------------|---------------------------------------------------------------------------------------------------|-------------|
| 4<br>5<br>6<br>7<br>8<br>9                                                                                                                                                                                                                                                                                                                                            | Cross <i>et al.</i> , 2010 <sup>15</sup>   | Implementation                | Prevention | All Stars                                                            | Schools                     | Inner (organizational-climate; training; provider; turnover) | None                                                                                                                    | Descriptive-Mixed methods (primarily quantitative) | Single - school                                                                                   | 5           |
| <p><b>Summary:</b> Analyses suggested that the quality of implementation varied across the 5 schools and that the 2 schools with the highest quality implementation had higher youth attendance in the program and better development of social skills.</p>                                                                                                           |                                            |                               |            |                                                                      |                             |                                                              |                                                                                                                         |                                                    |                                                                                                   |             |
| 10<br>11<br>12<br>13<br>14<br>15                                                                                                                                                                                                                                                                                                                                      | Di Noia <i>et al.</i> 2003 <sup>16</sup>   | Exploration                   | Prevention | Multiple                                                             | Schools, community agencies | Outer (Information transmission)                             | 3 different dissemination strategies (pamphlet, CD, internet)                                                           | RCT                                                | Single-provider                                                                                   | 188         |
| <p><b>Summary:</b> Exploration impacts (accessibility of materials, self-efficacy to select/recommend an intervention, and behavioral intentions to encourage adoption of interventions) was stronger in the internet group, intermediate in the CD-ROM group, and weakest in the pamphlet group.</p>                                                                 |                                            |                               |            |                                                                      |                             |                                                              |                                                                                                                         |                                                    |                                                                                                   |             |
| 16<br>17<br>18<br>19<br>20                                                                                                                                                                                                                                                                                                                                            | Ellis <i>et al.</i> , 2010 <sup>17</sup>   | Implementation                | Treatment  | Multisystemic Therapy                                                | Schools                     | Inner (provider; fidelity), Outcomes (parent)                | None                                                                                                                    | Descriptive-Quantitative                           | Single- youth (provider and school levels not specified or described)                             | 82/(?)/ (?) |
| <p><b>Summary:</b> Parent-reported parent/family characteristics (in particular parental psychopathology, motivation, treatment expectations, and child rearing practices) at baseline were statistically predictive of parent-reported therapist adherence to MST principles during treatment.</p>                                                                   |                                            |                               |            |                                                                      |                             |                                                              |                                                                                                                         |                                                    |                                                                                                   |             |
| 21<br>22<br>23<br>24<br>25                                                                                                                                                                                                                                                                                                                                            | Ennett <i>et al.</i> , 2011 <sup>18</sup>  | Implementation                | Prevention | Multiple                                                             | Schools                     | Inner (organizational; provider; fidelity) Outcomes (youth)  | None                                                                                                                    | Descriptive-Quantitative (staff survey)            | Single - school                                                                                   | 342         |
| <p><b>Summary:</b> Rates of fidelity were low overall - almost no providers were coded as fully demonstrating fidelity in all five domains. However, fidelity was high for quality of delivery and participant responsiveness; low for program differentiation; and modest for adherence and exposure (the latter representing the two core domains of fidelity).</p> |                                            |                               |            |                                                                      |                             |                                                              |                                                                                                                         |                                                    |                                                                                                   |             |
| 26<br>27<br>28<br>29<br>30<br>31<br>32<br>33                                                                                                                                                                                                                                                                                                                          | Epstein <i>et al.</i> , 2007 <sup>19</sup> | Preparation<br>Implementation | Treatment  | Stimulant Medication Dosage Determination Support                    | Primary care clinics        | Inner (provider; fidelity; coaching)                         | A pre-packaged and specialist-supported titration trial to determine optimal methylphenidate dose in children with ADHD | RCT                                                | Multiple-patient, provider, practice (note patient and provider levels dropped from key analyses) | 145/52/12   |
| <p><b>Summary:</b> Availability of the titration service increased the use of titration trials but not the monitoring of ADHD symptoms, and it did not impact ADHD symptomatology overall. However, patients who actually received this service received higher stimulant doses and experienced greater improvement in symptoms.</p>                                  |                                            |                               |            |                                                                      |                             |                                                              |                                                                                                                         |                                                    |                                                                                                   |             |
| 34<br>35<br>36<br>37<br>38<br>39<br>40                                                                                                                                                                                                                                                                                                                                | Epstein <i>et al.</i> , 2008 <sup>20</sup> | Implementation                | Treatment  | AAP ADHD Guidelines                                                  | Primary care clinics        | Outer (training); Inner (provider; fidelity)                 | Quality improving intervention for improving adherence to AAP ADHD treatment guidelines.                                | Quasi-Experimental (pre-post)                      | Single-practices, providers (analysis at provider level only)                                     | (19)/84     |
| <p><b>Summary:</b> The intervention yielded substantial improvement in guidelines use. Parent and teacher assessment rating scales use increased from 52-55% to nearly 100%. Systematic monitoring of responses to medication improved from 9% to 40%. Qualitative data suggests that adherence declined over time in some clinics.</p>                               |                                            |                               |            |                                                                      |                             |                                                              |                                                                                                                         |                                                    |                                                                                                   |             |
| 41<br>42<br>43<br>44<br>45<br>46<br>47<br>48<br>49                                                                                                                                                                                                                                                                                                                    | Fagen <i>et al.</i> , 2009 <sup>21</sup>   | Implementation                | Prevention | Violence, unsafe sex, and drug prevention-- "Aban Aya Youth Project" | Schools                     | Inner (organizational; training; supervision)                | None                                                                                                                    | Descriptive-mixed (predominantly qualitative)      | Single-School                                                                                     | 5           |

1  
2  
3  
4  
5  
6  
7  
8  
9  
10  
11  
12  
13  
14  
15  
16  
17  
18  
19  
20  
21  
22  
23  
24  
25  
26  
27  
28  
29  
30  
31  
32  
33  
34  
35  
36  
37  
38  
39  
40  
41  
42  
43  
44  
45  
46  
47  
48  
49

**Summary:** Study results showed uneven implementation of this parent-centered intervention across the five schools, and this finding was largely attributed to parent educator preparation and parent educator-health educator relations. The intervention's implementation did not stabilize after one year.

|                                         |                         |           |                         |                 |                                  |                                                                                   |                                                    |                 |    |
|-----------------------------------------|-------------------------|-----------|-------------------------|-----------------|----------------------------------|-----------------------------------------------------------------------------------|----------------------------------------------------|-----------------|----|
| Foster and Stiffman, 2009 <sup>22</sup> | Preparation Sustainment | Treatment | Decision Support System | Social services | Inner (organizational; provider) | System provided via personal digital assistant (PDA) or PDA plus desktop computer | Randomized Experimental/descriptive -mixed methods | Single-provider | 28 |
|-----------------------------------------|-------------------------|-----------|-------------------------|-----------------|----------------------------------|-----------------------------------------------------------------------------------|----------------------------------------------------|-----------------|----|

**Summary:** Quantitative results found that device usage increased, peaked, then declined and having the PDA and the desktop increased use. Qualitative results suggested that successful adoption of decision support systems requires 1) integration into the referral system, including workers' knowledge and experiences with referral resources; and 2) consideration of the natural flow of worker interaction and organizational constraints.

|                                   |                |           |                                                                                          |                                   |                        |                                                                                                                                                                                        |     |                                 |       |
|-----------------------------------|----------------|-----------|------------------------------------------------------------------------------------------|-----------------------------------|------------------------|----------------------------------------------------------------------------------------------------------------------------------------------------------------------------------------|-----|---------------------------------|-------|
| Garner et al., 2011 <sup>23</sup> | Implementation | Treatment | Adolescent Community Reinforcement Approach (A-CRA) and Assertive Continuing Care (ACC). | Substance abuse treatment clinics | Inner (organizational) | Pay for performance (payments for receiving a rating of at least minimal competency on an audio session recording and for each adolescent receiving a targeted threshold of treatment) | RCT | Multiple - providers and agency | 95/29 |
|-----------------------------------|----------------|-----------|------------------------------------------------------------------------------------------|-----------------------------------|------------------------|----------------------------------------------------------------------------------------------------------------------------------------------------------------------------------------|-----|---------------------------------|-------|

**Summary:** Therapists in the pay for performance condition reported significantly greater intentions to achieve each of the two quality targets (to achieve monthly intervention competence and to deliver the intervention at a targeted threshold level) during the first 3 months of the experiment.

|                                    |                |           |                                                           |                       |                                        |                                                                                                                                                                                                                   |     |                                                                                                                    |          |
|------------------------------------|----------------|-----------|-----------------------------------------------------------|-----------------------|----------------------------------------|-------------------------------------------------------------------------------------------------------------------------------------------------------------------------------------------------------------------|-----|--------------------------------------------------------------------------------------------------------------------|----------|
| Glisson et al., 2010 <sup>24</sup> | Implementation | Treatment | MST and ARC (availability, responsiveness and continuity) | Mental health clinics | Inner (organizational-culture/climate) | Organizational intervention (ARC) that addresses services barriers, training in principles of effective service systems, and facilitates the development of flexibility, openness, and engagement among providers | RCT | Multiple - youth, providers, counties (number of providers not specified, but this level was included in analyses) | 615/?/14 |
|------------------------------------|----------------|-----------|-----------------------------------------------------------|-----------------------|----------------------------------------|-------------------------------------------------------------------------------------------------------------------------------------------------------------------------------------------------------------------|-----|--------------------------------------------------------------------------------------------------------------------|----------|

**Summary:** At 6-month follow-up youth total problem behavior in the MST plus ARC condition was at a nonclinical level; significantly lower than in other conditions. At 18-month follow-up youth in the MST plus ARC condition entered out-of-home placements at a significantly lower rate than in the other conditions.

|                                    |                            |           |              |                       |                                        |      |                          |                         |     |
|------------------------------------|----------------------------|-----------|--------------|-----------------------|----------------------------------------|------|--------------------------|-------------------------|-----|
| Glisson et al., 2008 <sup>25</sup> | Implementation Sustainment | Treatment | Non-specific | Mental health clinics | Inner (organizational-climate/culture) | None | Descriptive-quantitative | Single-clinic directors | 100 |
|------------------------------------|----------------------------|-----------|--------------|-----------------------|----------------------------------------|------|--------------------------|-------------------------|-----|

**Summary:** Organizational culture best predicted new program sustainment while organizational climate and service structure best explained therapist turnover. Clinics with separate children's service units had higher turnover rates than clinics serving adults and children within the same unit.

|                                     |                |            |                                                         |         |                            |      |                                                                   |                                                                                                                                                                              |    |
|-------------------------------------|----------------|------------|---------------------------------------------------------|---------|----------------------------|------|-------------------------------------------------------------------|------------------------------------------------------------------------------------------------------------------------------------------------------------------------------|----|
| Goldberg et al., 2004 <sup>26</sup> | Implementation | Prevention | Life Skills Training and Strengthening Families Program | Schools | Inner (provider; fidelity) | None | Descriptive-Quantitative (using data collected as part of an RCT) | Parallel single - classroom or youths (levels of school and RCT arm not addressed; no hierarchical modeling). Precise number of participants at each level is not specified. | ?? |
|-------------------------------------|----------------|------------|---------------------------------------------------------|---------|----------------------------|------|-------------------------------------------------------------------|------------------------------------------------------------------------------------------------------------------------------------------------------------------------------|----|



1  
2  
3  
4  
5  
6  
7  
8  
9  
10  
11  
12  
13  
14  
15  
16  
17  
18  
19  
20  
21  
22  
23  
24  
25  
26  
27  
28  
29  
30  
31  
32  
33  
34  
35  
36  
37  
38  
39  
40  
41  
42  
43  
44  
45  
46  
47  
48  
49

|                                                                                                                                                                                                                                                                                                                                                                                                                               |                               |            |                                                    |                           |                                                                                   |                                                                                                      |                                                            |                                                                                              |        |
|-------------------------------------------------------------------------------------------------------------------------------------------------------------------------------------------------------------------------------------------------------------------------------------------------------------------------------------------------------------------------------------------------------------------------------|-------------------------------|------------|----------------------------------------------------|---------------------------|-----------------------------------------------------------------------------------|------------------------------------------------------------------------------------------------------|------------------------------------------------------------|----------------------------------------------------------------------------------------------|--------|
| <b>Summary:</b> For those classroom lessons that were evaluated by an observer, the implementation assessment correlation between providers and observers was .80 . Providers rated their implementation as better than observers. Only observer ratings predicted youth substance use outcomes.                                                                                                                              |                               |            |                                                    |                           |                                                                                   |                                                                                                      |                                                            |                                                                                              |        |
| Hamilton et al., 2011 <sup>27</sup>                                                                                                                                                                                                                                                                                                                                                                                           | Implementation                | Treatment  | Multiple                                           | Mental health clinics     | Outer (sociopolitical, funding, leadership); Inner (organizational; EBP fit)      | None                                                                                                 | Descriptive-Qualitative                                    | Multiple-source ethnographic (interviews, focus groups, meeting minutes, emails) in 1 clinic | (33)/1 |
| <b>Summary:</b> Because organizations were rated on access to care rather than EBP implementation by external reviewers, these assessments interfered with the implementation of EBPs.                                                                                                                                                                                                                                        |                               |            |                                                    |                           |                                                                                   |                                                                                                      |                                                            |                                                                                              |        |
| Hanbury et al., 2011 <sup>28</sup>                                                                                                                                                                                                                                                                                                                                                                                            | Implementation                | Prevention | Suicide Prevention Guidelines                      | Mental health clinics     | Inner (organizational; provider)                                                  | Staff training to improve adherence to mandated suicide prevention guidelines                        | Quasi-experimental (time series)/Descriptive-mixed methods | Multiple-provider, clinical teams                                                            | 93/8   |
| <b>Summary:</b> Training did not increase adherence with no change in targeted behavioral norms. Qualitative analyses indicated that the intervention, while well-received, failed to include inpatient staff, thereby reducing its impact.                                                                                                                                                                                   |                               |            |                                                    |                           |                                                                                   |                                                                                                      |                                                            |                                                                                              |        |
| Henderson et al., 2006 <sup>29</sup>                                                                                                                                                                                                                                                                                                                                                                                          | Preparation<br>Implementation | Prevention | The Arson Prevention Program for Children (TAPP-C) | Mental health clinics     | Intervention, Outer (training), Inner (adopter).                                  | Survey responses from mental health professionals who had participated in a TAPP-C educational event | Descriptive-quantitative (provider survey)                 | Single-provider                                                                              | 210    |
| <b>Summary:</b> Although 82% of providers chose to adopt the intervention, only 29% reported routine levels of implementation. Adoption was associated with perceived compatibility of the intervention with the provider's organization. Implementation was associated with provider sense of self-efficacy and educational exposure.                                                                                        |                               |            |                                                    |                           |                                                                                   |                                                                                                      |                                                            |                                                                                              |        |
| Henderson et al., 2008 <sup>30</sup>                                                                                                                                                                                                                                                                                                                                                                                          | Preparation                   | Treatment  | Multiple                                           | Criminal justice programs | Outer (inter-organizational networks), Inner (organizational-leadership)          | None                                                                                                 | Descriptive-quantitative                                   | Single-Programs                                                                              | 263    |
| <b>Summary:</b> Organizational structure, management's emphasis on the quality of treatment, training and resources variables as well as administrators' attitudes predicted EBP use. Connections to inter-organizational networks showed the strongest relationship with EBP use.                                                                                                                                            |                               |            |                                                    |                           |                                                                                   |                                                                                                      |                                                            |                                                                                              |        |
| Henderson et al., 2009 <sup>31</sup>                                                                                                                                                                                                                                                                                                                                                                                          | Preparation                   | Treatment  | Multiple                                           | Criminal justice programs | Outer (funding, inter-organizational networks), Inner (organizational-leadership) | None                                                                                                 | Descriptive-quantitative                                   | Multiple-program directors, state executives                                                 | 420/93 |
| <b>Summary:</b> Systems integration at the state level was associated with greater EBP use, state staffing adequacy and stability accentuated the association between local training and resources for new programs and EBP use. State executives' attitudes regarding the missions and goals of corrections tended to diminish the extent to which corresponding local administrator attitudes were associated with EBP use. |                               |            |                                                    |                           |                                                                                   |                                                                                                      |                                                            |                                                                                              |        |
| Henderson et al., 2010 <sup>32</sup>                                                                                                                                                                                                                                                                                                                                                                                          | Preparation<br>Implementation | Prevention | The Arson Prevention Program for Children (TAPP-C) | Home-based                | Outer (training; inter-organizational networks), Inner (provider)                 | Impacts of a prior dissemination effort                                                              | Descriptive-quantitative (provider survey)                 | Single-Provider                                                                              | 241    |
| <b>Summary:</b> Adoption was related to provider sense of self-efficacy, educational exposure to the intervention, and consultation with mental health professionals. Implementation was related to educational exposure and fire service consultation for the fire service component; mental health consultation for the mental health component.                                                                            |                               |            |                                                    |                           |                                                                                   |                                                                                                      |                                                            |                                                                                              |        |

1  
2  
3  
4  
5  
6  
7  
8  
9  
10  
11  
12  
13  
14  
15  
16  
17  
18  
19  
20  
21  
22  
23  
24  
25  
26  
27  
28  
29  
30  
31  
32  
33  
34  
35  
36  
37  
38  
39  
40  
41  
42  
43  
44  
45  
46  
47  
48  
49

|                                                                                                                                                                                                                                                                                                                                                                                                                                                        |                               |           |                                                           |                                                 |                                                                                                    |                                                                                                                                                                               |                                                          |                                            |                 |
|--------------------------------------------------------------------------------------------------------------------------------------------------------------------------------------------------------------------------------------------------------------------------------------------------------------------------------------------------------------------------------------------------------------------------------------------------------|-------------------------------|-----------|-----------------------------------------------------------|-------------------------------------------------|----------------------------------------------------------------------------------------------------|-------------------------------------------------------------------------------------------------------------------------------------------------------------------------------|----------------------------------------------------------|--------------------------------------------|-----------------|
| Henggeler<br><i>et al.</i> , 1997 <sup>33</sup>                                                                                                                                                                                                                                                                                                                                                                                                        | Implementation                | Treatment | Multisystemic<br>Therapy                                  | Mental health<br>clinics                        | Inner (provider;<br>fidelity)                                                                      | Implementation of<br>MST without fidelity<br>measures<br>compared to care<br>as usual (and MST<br>with fidelity<br>measures drawing<br>on prior<br>publications)              | RCT                                                      | Multiple - clinics/therapists/<br>youth    | 2/4/155         |
| <b>Summary:</b> Modest outcomes were achieved when not considering fidelity to MST, especially when compared to prior MST trials that included fidelity monitoring. Parent and adolescent ratings of treatment adherence predicted low rates of rearrest; and therapist ratings of treatment adherence and treatment engagement predicted decreased self-reported index offenses and low probability of incarceration, respectively                    |                               |           |                                                           |                                                 |                                                                                                    |                                                                                                                                                                               |                                                          |                                            |                 |
| Henggeler<br><i>et al.</i> , 2002 <sup>34</sup>                                                                                                                                                                                                                                                                                                                                                                                                        | Implementation                | Treatment | MST                                                       | Mental health<br>clinics                        | Inner<br>(organizational;<br>provider; fidelity)                                                   | None                                                                                                                                                                          | Descriptive-Quantitative                                 | Multiple-supervisors/therapists/<br>youths | 285/74/<br>12   |
| <b>Summary:</b> Supervisor experience with MST and other EBPs was associated with therapist fidelity to MST. Supervisor focus on the analytic process/treatment principles and developing therapist competencies was associated with lower therapist fidelity.                                                                                                                                                                                         |                               |           |                                                           |                                                 |                                                                                                    |                                                                                                                                                                               |                                                          |                                            |                 |
| Henggeler<br><i>et al.</i> , 2008 <sup>35</sup>                                                                                                                                                                                                                                                                                                                                                                                                        | Implementation<br>Sustainment | Treatment | Contingency<br>Management<br>within the<br>context of MST | Mental health<br>and substance<br>abuse clinics | Outer (training);<br>Inner<br>(organizational;<br>provider; fidelity;<br>coaching)                 | Workshop training +<br>intensive quality<br>assurance vs.<br>workshop training<br>only                                                                                        | RCT                                                      | Multiple-provider/caregiver-<br>youth      | 30/70           |
| <b>Summary:</b> Workshop plus intensive quality assurance was more effective than workshop only at increasing practitioner implementation of contingency management techniques in the short-term based on youth and caregiver reports, and these increases were sustained based on youth reports.                                                                                                                                                      |                               |           |                                                           |                                                 |                                                                                                    |                                                                                                                                                                               |                                                          |                                            |                 |
| Henggeler<br><i>et al.</i> , 2008 <sup>36</sup>                                                                                                                                                                                                                                                                                                                                                                                                        | Preparation<br>Implementation | Treatment | Contingency<br>Management                                 | Mental health<br>and substance<br>abuse clinics | Outer (training),<br>Inner (provider;<br>organizational-<br>climate)                               | Survey responses<br>from mental health<br>and substance<br>abuse professionals<br>who attended a 1-<br>day contingency<br>management<br>workshop (monthly<br>for six months). | Descriptive-quantitative<br>(provider survey)            | Multiple - provider, agency                | 225/44          |
| <b>Summary:</b> 58% of practitioners used CM; rates of adoption increased over the 6-month study period. Correlates of adoption included provider and organizational factors. Barriers to adoption included competing clinical priorities and lack of youth and family engagement. Fidelity of implementation of both the cognitive component and the monitoring component of CM were associated with both provider and organizational characteristics |                               |           |                                                           |                                                 |                                                                                                    |                                                                                                                                                                               |                                                          |                                            |                 |
| Herschell <i>et al.</i> , 2009 <sup>37</sup>                                                                                                                                                                                                                                                                                                                                                                                                           | Implementation                | Treatment | PCIT                                                      | Mental health<br>clinics                        | Outer (training)                                                                                   | "Experiential"<br>versus "didactic<br>(including role<br>playing)" training                                                                                                   | Experimental (non-<br>random assignment)                 | Single-Provider                            | 42              |
| <b>Summary:</b> Reading the manual resulted in statistically significant improvements in knowledge and skills, but did not result in material mastery. Both experiential and didactic methods resulted in significant increases in skills with no significant differences between these training methods.                                                                                                                                              |                               |           |                                                           |                                                 |                                                                                                    |                                                                                                                                                                               |                                                          |                                            |                 |
| Hoagwood<br><i>et al.</i> , 2006 <sup>38</sup>                                                                                                                                                                                                                                                                                                                                                                                                         | Implementation<br>Sustainment | Treatment | CBT                                                       | Mental health<br>clinics                        | Outer (inter-<br>organizational<br>networks); Inner<br>(organizational-<br>leadership,<br>culture) | None                                                                                                                                                                          | Descriptive-mixed<br>methods (primarily<br>quantitative) | Single - therapists                        | not<br>reported |

1  
2  
3  
4  
5  
6  
7  
8  
9  
10  
11  
12  
13  
14  
15  
16  
17  
18  
19  
20  
21  
22  
23  
24  
25  
26  
27  
28  
29  
30  
31  
32  
33  
34  
35  
36  
37  
38  
39  
40  
41  
42  
43  
44  
45  
46  
47  
48  
49

|                                                                                                                                                                                                                                                                                                                                                                                                                                                                                                  |                            |            |                                                                                                |                                           |                                                                                               |                                                                            |                                                   |                                                        |          |
|--------------------------------------------------------------------------------------------------------------------------------------------------------------------------------------------------------------------------------------------------------------------------------------------------------------------------------------------------------------------------------------------------------------------------------------------------------------------------------------------------|----------------------------|------------|------------------------------------------------------------------------------------------------|-------------------------------------------|-----------------------------------------------------------------------------------------------|----------------------------------------------------------------------------|---------------------------------------------------|--------------------------------------------------------|----------|
| <b>Summary:</b> Five key factors facilitated implementation: 1) early adoption and guidance by innovative leaders; 2) attention to the "fit" between the intervention and local practices; 3) attention to front-end implementation processes (e.g., cultural adaptation, translation, training, fiscal issues); 4) attention to back-end processes early in the project (e.g., sustainability); and 5) establishing strong relationships with multiple stakeholders within the program setting. |                            |            |                                                                                                |                                           |                                                                                               |                                                                            |                                                   |                                                        |          |
| Holth <i>et al.</i> , 2011 <sup>39</sup>                                                                                                                                                                                                                                                                                                                                                                                                                                                         | Implementation Sustainment | Treatment  | Multiple (MST, contingency management)                                                         | Mental health and substance abuse clinics | Outer (training); Inner (organizational; provider; fidelity; coaching)                        | Workshop training + intensive quality assurance vs. workshop training only | RCT                                               | Multiple-supervisor/provider                           | 21/41    |
| <b>Summary:</b> Compared to workshop only, intensive quality assurance enhanced therapist adherence to CBT techniques but not to contingency management. Cannabis abstinence increased as a function of time in therapy and was more likely with stronger adherence to contingency management.                                                                                                                                                                                                   |                            |            |                                                                                                |                                           |                                                                                               |                                                                            |                                                   |                                                        |          |
| Jensen-Doss <i>et al.</i> , 2009 <sup>40</sup>                                                                                                                                                                                                                                                                                                                                                                                                                                                   | Implementation             | Treatment  | Multiple                                                                                       | Mental health clinics                     | Inner (adopter; organizational-climate; training)                                             | Statewide mandate for using specific EBPs                                  | Descriptive-quantitative (provider survey)        | Single-provider                                        | 197      |
| <b>Summary:</b> Better attitudes towards EBPs were predicted by less formal education, colleagues' support for EBPs, agency and supervisor support for the EBPs, positive perception of training, and fewer institutional barriers to EBP implementation.                                                                                                                                                                                                                                        |                            |            |                                                                                                |                                           |                                                                                               |                                                                            |                                                   |                                                        |          |
| Kam <i>et al.</i> , 2003 <sup>41</sup>                                                                                                                                                                                                                                                                                                                                                                                                                                                           | Implementation             | Prevention | Promoting Alternative Thinking Skills                                                          | Schools                                   | Inner (organizational-leadership; provider; fidelity)                                         | None                                                                       | Descriptive-Quantitative                          | School                                                 | 3        |
| <b>Summary:</b> Only the combination of high quality of implementation by teachers and high principal support was associated with significantly greater reductions in aggression and behavioral dysregulation, and significant increases in emotional competence. Neither factor alone predicted intervention effectiveness.                                                                                                                                                                     |                            |            |                                                                                                |                                           |                                                                                               |                                                                            |                                                   |                                                        |          |
| Klimes-Dougan <i>et al.</i> , 2009 <sup>42</sup>                                                                                                                                                                                                                                                                                                                                                                                                                                                 | Implementation             | Prevention | Early Risers                                                                                   | Schools                                   | Inner (organizational-climate/culture; provider; fidelity)                                    | None                                                                       | Descriptive-Quantitative                          | Single-providers                                       | 27       |
| <b>Summary:</b> Provider personality traits, beliefs, and use of flexible coping were related to various fidelity indexes. Teachers' negative perceptions of the organizational climate/culture were positively related to fidelity and child exposure to the intervention.                                                                                                                                                                                                                      |                            |            |                                                                                                |                                           |                                                                                               |                                                                            |                                                   |                                                        |          |
| Kolko <i>et al.</i> , 2012 <sup>43</sup>                                                                                                                                                                                                                                                                                                                                                                                                                                                         | Implementation             | Treatment  | AF-CBT                                                                                         | Mental health clinics, child welfare      | Outer (training)                                                                              | "Learning community"-based training versus training as usual               | RCT                                               | Multi-agency (not addressed in analyses)/providers     | (10)/182 |
| <b>Summary:</b> Providers who participated in the community condition rated higher on knowledge and use of skills included in the EBP. Practitioners in both groups reported significantly more negative perceptions of organizational climate during the intervention phase                                                                                                                                                                                                                     |                            |            |                                                                                                |                                           |                                                                                               |                                                                            |                                                   |                                                        |          |
| Langley <i>et al.</i> , 2010 <sup>44</sup>                                                                                                                                                                                                                                                                                                                                                                                                                                                       | Implementation             | Treatment  | CBITS                                                                                          | Schools                                   | Inner (organizational-leadership; provider)                                                   | None                                                                       | Descriptive-Mixed methods (primarily qualitative) | School                                                 | 35       |
| <b>Summary:</b> Participants reported similar barriers to implementation: limited support from administrators and teachers, logistical challenges, competing responsibilities, and parental disengagement. Sites overcoming these barriers had greater organizational structure, a social network of other clinicians implementing CBITS, and administrative support for implementation.                                                                                                         |                            |            |                                                                                                |                                           |                                                                                               |                                                                            |                                                   |                                                        |          |
| Leslie <i>et al.</i> , 2004 <sup>45</sup>                                                                                                                                                                                                                                                                                                                                                                                                                                                        | Exploration                | Treatment  | Training, clinical materials, and additional staff support for diagnosis and treatment of ADHD | Pediatrics practices                      | Intervention, Outer (Inter-organizational networks), Inner (organizational; provider; family) | Pilot Implementation                                                       | Descriptive-mixed methods                         | Multiple clinic/provider/patient (analyzed separately) | 7/16/116 |

1  
2  
3  
4  
5  
6  
7  
8  
9  
10  
11  
12  
13  
14  
15  
16  
17  
18  
19  
20  
21  
22  
23  
24  
25  
26  
27  
28  
29  
30  
31  
32  
33  
34  
35  
36  
37  
38  
39  
40  
41  
42  
43  
44  
45  
46  
47  
48  
49

|                                            |                                                                                                                                                                                                                                                                                                                                                                                                                                                                                      |            |                                  |                                       |                                                                                   |                                                                                   |                                                               |                                                                                                                  |             |  |
|--------------------------------------------|--------------------------------------------------------------------------------------------------------------------------------------------------------------------------------------------------------------------------------------------------------------------------------------------------------------------------------------------------------------------------------------------------------------------------------------------------------------------------------------|------------|----------------------------------|---------------------------------------|-----------------------------------------------------------------------------------|-----------------------------------------------------------------------------------|---------------------------------------------------------------|------------------------------------------------------------------------------------------------------------------|-------------|--|
|                                            | <b>Summary:</b> The intervention was acceptable and feasible from all stakeholders' perspectives, but it did not adequately guide pediatricians in the assessment of complex clinical presentations or the management of limited insurance coverage and connections with specialist mental health providers.                                                                                                                                                                         |            |                                  |                                       |                                                                                   |                                                                                   |                                                               |                                                                                                                  |             |  |
| Liddle <i>et al.</i> , 2006 <sup>46</sup>  | Implementation                                                                                                                                                                                                                                                                                                                                                                                                                                                                       | Treatment  | Multi-Dimensional Family Therapy | Substance abuse day treatment clinics | Inner (organizational; training; provider; fidelity); Outcomes (patient)          | Staff training and supervision                                                    | Quasi-experimental (interrupted time series)                  | Multiple-provider/patient (analyzed independently)                                                               | 10/104      |  |
|                                            | <b>Summary:</b> Training and post-training phases of trial had more therapy sessions than baseline, increased focus on MDFT themes, and increased adherence. Clients rated environment as more controlled, more practical/useful, less clarity, more youth autonomy. Youths treated in training and post-training phases had higher levels of abstinence, lower rates of out of home placement, as well as externalizing and internalizing symptoms than youths treated at baseline. |            |                                  |                                       |                                                                                   |                                                                                   |                                                               |                                                                                                                  |             |  |
| Lochman <i>et al.</i> , 2009 <sup>47</sup> | Implementation                                                                                                                                                                                                                                                                                                                                                                                                                                                                       | Prevention | Coping Power                     | Schools                               | Outer (training); Inner (provider; fidelity); Outcomes (youth)                    | 2 different levels of training and a control condition                            | RCT                                                           | Multiple-school/counselor/student (school not included in modeling-some schools shared counselors)               | (57)/49/531 |  |
|                                            | <b>Summary:</b> The higher intensity training condition resulted in better engagement with students and better child outcomes (reductions in children's externalizing behavior problems and improvement in their social and academic skills).                                                                                                                                                                                                                                        |            |                                  |                                       |                                                                                   |                                                                                   |                                                               |                                                                                                                  |             |  |
| McBride <i>et al.</i> , 2002 <sup>48</sup> | Implementation                                                                                                                                                                                                                                                                                                                                                                                                                                                                       | Prevention | SHAHRP                           | Schools                               | Intervention, Outer (training); Inner (provider; fidelity), Outcomes (youth)      | None-Description of the factors associated with implementing SHAHRP with fidelity | Descriptive-mixed (primarily qualitative)                     | Multiple-school/teacher/student                                                                                  | 6/61/970    |  |
|                                            | <b>Summary:</b> Most teachers liked the training and higher teacher motivation was associated with a greater willingness to implement with fidelity. The inability to cover entire lessons within available time slots was a problem for many teachers. Fidelity varied by school and teachers with more training had slightly better fidelity, but fidelity was not related to student outcomes.                                                                                    |            |                                  |                                       |                                                                                   |                                                                                   |                                                               |                                                                                                                  |             |  |
| Olson <i>et al.</i> , 2005 <sup>49</sup>   | Implementation                                                                                                                                                                                                                                                                                                                                                                                                                                                                       | Treatment  | AAP ADHD Guidelines              | University pediatrics clinic          | Inner (organizational; training; provider; fidelity)                              | Formal diagnostic protocol                                                        | Quasi-experimental (Comparison Group Pretest/Posttest Design) | Single-provider                                                                                                  | 31          |  |
|                                            | <b>Summary:</b> Four percent of providers adhered to guidelines pre intervention, while 82% adhered after intervention. Significant improvement was observed across each of the four criteria in the AAP guidelines, and improved adherence was noted for residents and faculty alike.                                                                                                                                                                                               |            |                                  |                                       |                                                                                   |                                                                                   |                                                               |                                                                                                                  |             |  |
| Ozer <i>et al.</i> , 2010 <sup>50</sup>    | Implementation                                                                                                                                                                                                                                                                                                                                                                                                                                                                       | Prevention | Multiple                         | Schools                               | Outer (intervention developers), Inner (provider; fidelity; adaptation)           | None                                                                              | Descriptive-Mixed methods (primarily qualitative)             | Multiple-interdigitating qualitative analysis (classroom observations; teacher interviews; student focus groups) | 163/22/188  |  |
|                                            | <b>Summary:</b> Teacher most frequently changed the instructional format to accommodate students and adding in "real-life" examples" Students recommended "surface" modifications to make the content more appealing to youth. Intervention developers considered most adaptations acceptable.                                                                                                                                                                                       |            |                                  |                                       |                                                                                   |                                                                                   |                                                               |                                                                                                                  |             |  |
| Palinkas and Aarons, 2009 <sup>51</sup>    | Implementation                                                                                                                                                                                                                                                                                                                                                                                                                                                                       | Treatment  | SafeCare                         | Child welfare                         | Outer (interorganizational networks), Inner (organizational-leadership; provider) | None                                                                              | Descriptive-Qualitative                                       | Single-administrators                                                                                            | 13          |  |
|                                            | <b>Summary:</b> Identified 6 issues important for implementation; resource availability, positive external relations, agency leadership support, motivated staff, benefits for staff, perceived benefit over costs.                                                                                                                                                                                                                                                                  |            |                                  |                                       |                                                                                   |                                                                                   |                                                               |                                                                                                                  |             |  |

1  
2  
3  
4  
5  
6  
7  
8  
9  
10  
11  
12  
13  
14  
15  
16  
17  
18  
19  
20  
21  
22  
23  
24  
25  
26  
27  
28  
29  
30  
31  
32  
33  
34  
35  
36  
37  
38  
39  
40  
41  
42  
43  
44  
45  
46  
47  
48  
49

|                                                                                                                                                                                                                                                                                                                                                                                                                                                                                              |                |            |                                |                                      |                                                                         |                                                     |                          |                                                                                                                                     |            |
|----------------------------------------------------------------------------------------------------------------------------------------------------------------------------------------------------------------------------------------------------------------------------------------------------------------------------------------------------------------------------------------------------------------------------------------------------------------------------------------------|----------------|------------|--------------------------------|--------------------------------------|-------------------------------------------------------------------------|-----------------------------------------------------|--------------------------|-------------------------------------------------------------------------------------------------------------------------------------|------------|
| Palinkas <i>et al.</i> , 2008 <sup>52</sup>                                                                                                                                                                                                                                                                                                                                                                                                                                                  | Implementation | Treatment  | Multiple                       | Mental health clinics                | Outer (intervention developers), Inner (provider; fidelity; adaptation) | None                                                | Descriptive-Qualitative  | Multiple-interdigitating qualitative analyses (key informant interviews [trainers/supervisors/clinicians], participant observation) | 62         |
| <b>Summary:</b> Identified 3 "intentions" for EBP implementation: implement with fidelity, abandon the EBP, and selective/partial implementation. Three pre-implementation factors emerged: lag between training and use of EBP, clinician engagement, and clinician EBP fit. Four short-term implementation factors were also identified: first impression of EBPs after initial use, competence in EBP use, clinician and researcher adaptability, and clinician-researcher relationships. |                |            |                                |                                      |                                                                         |                                                     |                          |                                                                                                                                     |            |
| Palinkas <i>et al.</i> , 2009 <sup>53</sup>                                                                                                                                                                                                                                                                                                                                                                                                                                                  | Implementation | Treatment  | Multiple                       | Mental health clinics, child welfare | Outer (Intervention developers), Inner (provider; fidelity; adaptation) | None                                                | Descriptive-Qualitative  | Multiple-interdigitating qualitative analysis (administrator/supervisor, consultant/trainer, provider interviews)                   | 94         |
| <b>Summary:</b> Productive interactions between EBP propagators (researchers, trainers, supervisors) and EBP end users (agency directors, clinicians) require accessibility, mutual respect, a shared language, and a willingness to negotiate and compromise.                                                                                                                                                                                                                               |                |            |                                |                                      |                                                                         |                                                     |                          |                                                                                                                                     |            |
| Pankratz and Hallfors, 2004 <sup>54</sup>                                                                                                                                                                                                                                                                                                                                                                                                                                                    | Preparation    | Prevention | Multiple                       | Schools                              | Inner (organizational-leadership)                                       | None                                                | Descriptive-quantitative | Single-Schools                                                                                                                      | 99         |
| <b>Summary:</b> The majority of school districts use evidence-based prevention curricula; they are rarely the most commonly used curricula. Evidence-based curricula are much more likely to be used at the middle school level than at the elementary or high school levels. Urbanicity, coordinator time, and coordinator experience correlated with extensive use, but only coordinator time significantly predicted extensive use                                                        |                |            |                                |                                      |                                                                         |                                                     |                          |                                                                                                                                     |            |
| Pankratz <i>et al.</i> , 2006 <sup>55</sup>                                                                                                                                                                                                                                                                                                                                                                                                                                                  | Implementation | Prevention | Protecting Me/Protecting you   | Schools                              | Inner (provider; fidelity; adaptation)                                  | None                                                | Descriptive-Quantitative | Single-teachers                                                                                                                     | 17         |
| <b>Summary:</b> Teachers attempted to implement most sections of a lesson, but lessons were consistently and extensively adapted. Teachers were more likely to delete content than to add to it, and teachers who extensively adapted one lesson tend to adapt other lessons. Percent of lessons completed also varied across teachers.                                                                                                                                                      |                |            |                                |                                      |                                                                         |                                                     |                          |                                                                                                                                     |            |
| Pentz <i>et al.</i> , 1990 <sup>56</sup>                                                                                                                                                                                                                                                                                                                                                                                                                                                     | Implementation | Prevention | Midwestern Prevention Project  | Schools                              | Inner (organizational; provider; fidelity), Outcomes (participant)      | Implementation versus wait list control (by school) | RCT                      | Multiple-schools/teachers/students                                                                                                  | 42/65/5065 |
| <b>Summary:</b> All schools implemented the program. Exposure to the intervention was the strongest predictor of student outcome (minimizing increases in drug use behavior). Reinvention (adherence/adaptation) was not related to student outcome.                                                                                                                                                                                                                                         |                |            |                                |                                      |                                                                         |                                                     |                          |                                                                                                                                     |            |
| Riley <i>et al.</i> , 2008 <sup>57</sup>                                                                                                                                                                                                                                                                                                                                                                                                                                                     | Implementation | Treatment  | MET/CBT5                       | Substance abuse treatment programs   | Inner (organizational; provider; fidelity; adaptation)                  | None                                                | Descriptive-Qualitative  | Single-schools                                                                                                                      | 9          |
| <b>Summary:</b> Programs modified the intervention without concern of potential impact on its effectiveness and use of fidelity monitoring diminishing over time. Major modifications included going from group to individual sessions, cultural adaptations, and extending treatment beyond 5 sessions.                                                                                                                                                                                     |                |            |                                |                                      |                                                                         |                                                     |                          |                                                                                                                                     |            |
| Robbins <i>et al.</i> , 2011 <sup>58</sup>                                                                                                                                                                                                                                                                                                                                                                                                                                                   | Implementation | Treatment  | Brief Strategic Family Therapy | Substance abuse treatment programs   | Inner (provider; fidelity; adaptation), Outcomes (youth)                | None (treatment arm of an RCT)                      | Descriptive-Quantitative | Multiple-program/clinicians, patients (partial use of multi-level modeling)                                                         | 8/20/415   |
| <b>Summary:</b> Therapist adherence was associated with engagement and retention in treatment, improvements in family functioning, and reductions in adolescent drug use.                                                                                                                                                                                                                                                                                                                    |                |            |                                |                                      |                                                                         |                                                     |                          |                                                                                                                                     |            |

1  
2  
3  
4  
5  
6  
7  
8  
9  
10  
11  
12  
13  
14  
15  
16  
17  
18  
19  
20  
21  
22  
23  
24  
25  
26  
27  
28  
29  
30  
31  
32  
33  
34  
35  
36  
37  
38  
39  
40  
41  
42  
43  
44  
45  
46  
47  
48  
49

|                                                                                                                                                                                                                                                                                                                                                                                                                                                                                                                                                                                                                                                                          |                            |            |                                            |                        |                                                                                                    |                                                                        |                          |                                        |             |
|--------------------------------------------------------------------------------------------------------------------------------------------------------------------------------------------------------------------------------------------------------------------------------------------------------------------------------------------------------------------------------------------------------------------------------------------------------------------------------------------------------------------------------------------------------------------------------------------------------------------------------------------------------------------------|----------------------------|------------|--------------------------------------------|------------------------|----------------------------------------------------------------------------------------------------|------------------------------------------------------------------------|--------------------------|----------------------------------------|-------------|
| Roberts-Gray <i>et al.</i> , 2007 <sup>59</sup>                                                                                                                                                                                                                                                                                                                                                                                                                                                                                                                                                                                                                          | Implementation             | Prevention | Texas Tobacco Prevention Initiative (TTPI) | Schools                | Inner (organizational-leadership; training; provider)                                              | None                                                                   | Descriptive-quantitative | Single-schools                         | 47          |
| <b>Summary:</b> The school-based leadership factor was an independent predictor of quality of adherence whereas the facilitation processes factor (implementation, plans, training, supervision, communication) predicted quantity of implementing activity.                                                                                                                                                                                                                                                                                                                                                                                                             |                            |            |                                            |                        |                                                                                                    |                                                                        |                          |                                        |             |
| Rohrbach <i>et al.</i> 1993 <sup>60</sup>                                                                                                                                                                                                                                                                                                                                                                                                                                                                                                                                                                                                                                | Preparation Implementation | Prevention | Adolescent Alcohol Prevention Trial        | Schools                | Inner (organizational-leadership; adopter)                                                         | Brief vs. intensive training x principal vs. no principal intervention | RCT                      | Multiple-teacher/school                | 60/25       |
| <b>Summary:</b> There was no difference in rates of implementation/fidelity between the brief and intensive teacher training. Principal training increased implementation/fidelity. Teachers who reported higher rates of implementation/fidelity also reported less teaching experience, stronger self-efficacy, greater enthusiasm, better preparedness, higher teaching method compatibility, and greater principal encouragement. Integrity of implementation was related to positive program outcomes.                                                                                                                                                              |                            |            |                                            |                        |                                                                                                    |                                                                        |                          |                                        |             |
| Rohrbach <i>et al.</i> , 2005 <sup>61</sup>                                                                                                                                                                                                                                                                                                                                                                                                                                                                                                                                                                                                                              | Preparation                | Prevention | Multiple                                   | Schools                | Outer (sociopolitical; inter-organizational networks; advocacy), Inner (organizational-leadership) | None                                                                   | Descriptive-quantitative | Single-Schools                         | 1593        |
| <b>Summary:</b> Factors associated with EBP adoption included using information from a state substance use prevention group, national substance abuse prevention groups, local needs assessment data, research about effective curricula, and allocating coordinator time to prevention activities.                                                                                                                                                                                                                                                                                                                                                                      |                            |            |                                            |                        |                                                                                                    |                                                                        |                          |                                        |             |
| Sanders <i>et al.</i> , 2009 <sup>62</sup>                                                                                                                                                                                                                                                                                                                                                                                                                                                                                                                                                                                                                               | Preparation                | Prevention | Triple P-Positive Parenting Program (PPP)  | Human service settings | Inner (organizational; provider)                                                                   | None                                                                   | Descriptive-quantitative | Providers                              | 611         |
| <b>Summary:</b> Practitioners were more likely to use Triple P if they received positive client feedback, experienced minor barriers to implementation, and consulted with other practitioners. They were less likely to use Triple P if they were less confident about either delivering the EBP or consulting with parents, or reported low workplace support.                                                                                                                                                                                                                                                                                                         |                            |            |                                            |                        |                                                                                                    |                                                                        |                          |                                        |             |
| Schoenwald <i>et al.</i> , 2003 <sup>63</sup>                                                                                                                                                                                                                                                                                                                                                                                                                                                                                                                                                                                                                            | Implementation             | Treatment  | MST                                        | Mental health clinics  | Inner (organizational-climate; provider; fidelity)                                                 | None                                                                   | Descriptive-Quantitative | Multiple-program/clinicians/patients   | 39/217/666  |
| <b>Summary:</b> Therapist adherence, organizational climate and structure at baseline directly affected immediate post treatment child outcomes, but results for specific organizational variables were mixed with some subscales working in the opposite of the hypothesized direction. Post hoc analysis suggested that organizational factors are important predictors of child outcomes only when adherence to MST protocol is low.                                                                                                                                                                                                                                  |                            |            |                                            |                        |                                                                                                    |                                                                        |                          |                                        |             |
| Schoenwald <i>et al.</i> , 2005 <sup>64</sup>                                                                                                                                                                                                                                                                                                                                                                                                                                                                                                                                                                                                                            | Implementation             | Treatment  | MST                                        | Mental health clinics  | Inner (provider; fidelity) Outcomes (caregiver; youth)                                             | None                                                                   | Descriptive-Quantitative | Multiple-program, clinicians, patients | 45/405/1711 |
| <b>Summary:</b> Therapist demographic variables, professional training and experience, endorsement of the MST model, perceived difficulty and rewards of doing MST, and perceived similarity to treatments previously used did not predict adherence. Therapist perceptions that the flexible hours required to implement MST are problematic predicted lower adherence. Therapist-caregiver similarity on ethnicity and gender predicted higher adherence. Low caregiver education and African American ethnicity predicted higher adherence. With the exception of youth psychosocial functioning, indicators of severity of youth problems did not predict adherence. |                            |            |                                            |                        |                                                                                                    |                                                                        |                          |                                        |             |
| Schoenwald <i>et al.</i> , 2008 <sup>65</sup>                                                                                                                                                                                                                                                                                                                                                                                                                                                                                                                                                                                                                            | Implementation             | Treatment  | MST                                        | Mental health clinics  | Inner (organizational-climate; provider; fidelity), Outcomes (youth)                               | None                                                                   | Descriptive-quantitative | Multiple-clinic/provider/youth         | 45/429/1979 |

1  
2  
3  
4  
5  
6  
7  
8  
9  
10  
11  
12  
13  
14  
15  
16  
17  
18  
19  
20  
21  
22  
23  
24  
25  
26  
27  
28  
29  
30  
31  
32  
33  
34  
35  
36  
37  
38  
39  
40  
41  
42  
43  
44  
45  
46  
47  
48  
49

**Summary:** Therapist adherence and organizational climate and structure yielded improved youth outcomes. One climate and two structural variables predicted changes in youth behavior, and the climate variable also predicted therapist adherence. However the climate and structure variables were not associated with therapist adherence.

|                                       |                |           |          |                       |                                                         |      |                          |                 |     |
|---------------------------------------|----------------|-----------|----------|-----------------------|---------------------------------------------------------|------|--------------------------|-----------------|-----|
| Schoenwald et al., 2008 <sup>66</sup> | Implementation | Treatment | Multiple | Mental health clinics | Inner (organizational; provider; training; supervision) | None | Descriptive-Quantitative | Single-programs | 200 |
|---------------------------------------|----------------|-----------|----------|-----------------------|---------------------------------------------------------|------|--------------------------|-----------------|-----|

**Summary:** For-profit organizations were more likely to implement new treatments; organizations with more licensed staff and weekly supervision were less likely. Compared to private organization directors, public organization directors found it more important that new treatments align with prevailing practices, infrastructure support, organizational mission, and internal support.

|                                       |                |           |     |                       |                                                                          |      |                          |                                        |             |
|---------------------------------------|----------------|-----------|-----|-----------------------|--------------------------------------------------------------------------|------|--------------------------|----------------------------------------|-------------|
| Schoenwald et al., 2009 <sup>67</sup> | Implementation | Treatment | MST | Mental health clinics | Inner (organizational; supervision; fidelity; provider) Outcomes (youth) | None | Descriptive-Quantitative | Multiple-program, clinicians, patients | 45/429/1979 |
|---------------------------------------|----------------|-----------|-----|-----------------------|--------------------------------------------------------------------------|------|--------------------------|----------------------------------------|-------------|

**Summary:** Supervisor focus on adherence predicted greater therapist adherence. Two supervision dimensions, adherence to the structure and process of supervision, and focus on clinician development, predicted changes in youth behavior.

|                                       |                |           |     |                       |                                                 |      |                          |                                     |             |
|---------------------------------------|----------------|-----------|-----|-----------------------|-------------------------------------------------|------|--------------------------|-------------------------------------|-------------|
| Schoenwald et al., 2012 <sup>68</sup> | Implementation | Treatment | MST | Mental health clinics | Inner (organizational-climate) Outcomes (youth) | None | Descriptive-Quantitative | Multi-program, clinicians, patients | 45/429/1979 |
|---------------------------------------|----------------|-----------|-----|-----------------------|-------------------------------------------------|------|--------------------------|-------------------------------------|-------------|

**Summary:** Findings some support found for positive aspects of organizational climate decreasing symptoms and negative aspects increasing symptoms. However, there were a great deal of null findings as well as unexpected findings. For example, for substance abusing youth, more positive indices of climate predicted increases in externalizing and internalizing problems.

|                                    |             |            |     |                                                  |                                                        |      |                          |                  |     |
|------------------------------------|-------------|------------|-----|--------------------------------------------------|--------------------------------------------------------|------|--------------------------|------------------|-----|
| Shapiro et al., 2011 <sup>69</sup> | Sustainment | Prevention | PPP | Multiple (mental health, schools, child welfare) | Inner (organizational; supervision; EBP fit; provider) | None | Descriptive-Quantitative | Single-providers | 174 |
|------------------------------------|-------------|------------|-----|--------------------------------------------------|--------------------------------------------------------|------|--------------------------|------------------|-----|

**Summary:** Requirements to use PPP was related to implementation but not amount of use. The ability to discuss cases and receive consultation or supervision significantly predicted program use.

|                                    |             |           |                       |                       |                                  |      |                          |                           |     |
|------------------------------------|-------------|-----------|-----------------------|-----------------------|----------------------------------|------|--------------------------|---------------------------|-----|
| Stevens et al., 2011 <sup>70</sup> | Preparation | Treatment | Medication guidelines | Mental health clinics | Inner (organizational; provider) | None | Descriptive-quantitative | Single - Clinic Directors | 152 |
|------------------------------------|-------------|-----------|-----------------------|-----------------------|----------------------------------|------|--------------------------|---------------------------|-----|

**Summary:** Medication guideline use was related to utilizing standardized child outcome measures but not related to the employment of a child psychiatrist. Many clinic directors reported they did not use medication guidelines in their programs.

|                                    |                |            |                    |         |                                           |      |                                               |                                                 |    |
|------------------------------------|----------------|------------|--------------------|---------|-------------------------------------------|------|-----------------------------------------------|-------------------------------------------------|----|
| Thakiro et al., 2008 <sup>71</sup> | Implementation | Prevention | Reconnecting Youth | Schools | Inner (organizational; EBP fit; training) | None | Descriptive-mixed (predominantly qualitative) | Multiple-administrators, school staff, teachers | 38 |
|------------------------------------|----------------|------------|--------------------|---------|-------------------------------------------|------|-----------------------------------------------|-------------------------------------------------|----|

**Summary:** Implementation was impacted by the EBP's structural fit with schools, particularly the need for small classes, student selection, and intensive training of interventionists. Limited financial resources, limited leadership support, as well as planned and unplanned changes hindered implementation

|                                   |                |           |                  |                      |                                                                         |      |                          |                  |     |
|-----------------------------------|----------------|-----------|------------------|----------------------|-------------------------------------------------------------------------|------|--------------------------|------------------|-----|
| Turner et al., 2011 <sup>72</sup> | Implementation | Treatment | Primary Care PPP | Primary care clinics | Outer (training materials); Inner (organizational-leadership; provider) | None | Descriptive-Quantitative | Single-providers | 488 |
|-----------------------------------|----------------|-----------|------------------|----------------------|-------------------------------------------------------------------------|------|--------------------------|------------------|-----|

**Summary:** 97% of practitioners reported using Triple P following training. Program supports and barriers impacted on practitioner self-efficacy, and higher self-efficacy was positively associated with implementation. Prior professional experience, satisfaction with training, and workplace factors were not significant predictors.

1  
2  
3  
4  
5  
6  
7  
8  
9  
10  
11  
12  
13  
14  
15  
16  
17  
18  
19  
20  
21  
22  
23  
24  
25  
26  
27  
28  
29  
30  
31  
32  
33  
34  
35  
36  
37  
38  
39  
40  
41  
42  
43  
44  
45  
46  
47  
48  
49

|                                                                                                                                                                                                                                                                                    |                             |           |                          |                          |                                                                                         |                                                          |                                      |                                                                                                            |           |
|------------------------------------------------------------------------------------------------------------------------------------------------------------------------------------------------------------------------------------------------------------------------------------|-----------------------------|-----------|--------------------------|--------------------------|-----------------------------------------------------------------------------------------|----------------------------------------------------------|--------------------------------------|------------------------------------------------------------------------------------------------------------|-----------|
| Vismara <i>et al.</i> , 2009 <sup>73</sup>                                                                                                                                                                                                                                         | Implementation              | Treatment | Early Start Denver Model | Early Intervention Sites | Outer (training)                                                                        | In-person versus distance (via videoconference) training | Experimental (non-random assignment) | Program/Provider/Parent-Child (analyses use provider or child as unit of analyses, no multilevel modeling) | (4)/10/32 |
| <b>Summary:</b> Distance learning and live instruction were equally effective for teaching therapists to implement the model, to train parents, and to achieve improvement in child symptoms and behaviors.                                                                        |                             |           |                          |                          |                                                                                         |                                                          |                                      |                                                                                                            |           |
| Zazzali <i>et al.</i> , 2008 <sup>74</sup>                                                                                                                                                                                                                                         | Preparation, Implementation | Treatment | FFT                      | Mental health clinics    | Outer (sociopolitical; interorganizational networks), Inner (organizational-leadership) | None                                                     | Descriptive-qualitative              | Single-organization                                                                                        | 14        |
| <b>Summary:</b> Factors associated with FFT's adoption included compatibility with the organization's mission and the organization's interest in EBPs. Factors facilitating FFT's implementation included fit with organizational characteristics (resources, structure, culture). |                             |           |                          |                          |                                                                                         |                                                          |                                      |                                                                                                            |           |

Note: AAP=American Academy of Pediatrics; ADHD=attention-deficit/hyperactivity disorder; AF-CBT=Alternatives for Families: A Cognitive-Behavioral Therapy (AF-CBT); ARC=availability, responsiveness, and continuity; CAFAS=Child And Adolescent Functional Assessment Scale; CBITS=Cognitive Behavioral Intervention for Trauma in Schools; CBT=cognitive behavioral therapy; CD=compact disc; FFT=functional family therapy; MET/CBT5=Motivational Enhancement Therapy plus Cognitive Behavioral Therapy; MST=Multisystemic Therapy; RCT=randomized controlled trial; SHAHRP= School Health and Alcohol Harm Reduction Project.



1  
2  
3  
4 Supplemental References  
5  
6  
7  
8

- 9 1. Moher D, Liberati A, Tetzlaff J, Altman DG. Preferred reporting items for systematic  
10 reviews and meta-analyses: the PRISMA statement. PLoS medicine.  
11 2009;6(7):e1000097.  
12  
13  
14  
15 2. Aarons GA, Sawitzky AC. Organizational culture and climate and mental health provider  
16 attitudes toward evidence-based practice. Psychol Serv. 2006;3(1):61-72.  
17  
18  
19 3. Aarons GA, Sommerfeld DH, Hecht DB, Silovsky JF, Chaffin MJ. The impact of  
20 evidence-based practice implementation and fidelity monitoring on staff turnover:  
21 Evidence for a protective effect. J Consult Clin Psychol. 2009;77(2):270-280.  
22  
23  
24 4. Aarons GA, Fettes DL, Flores LE, Sommerfeld DH. Evidence-based practice  
25 implementation and staff emotional exhaustion in children's services. Behav Res Ther.  
26 2009;47(11):954-960.  
27  
28  
29 5. Aarons GA, Wells RS, Zagursky K, Fettes DL, Palinkas LA. Implementing evidence-  
30 based practice in community mental health agencies: A multiple stakeholder analysis.  
31 Am J Public Health. 2009;99(11):2087-2095.  
32  
33  
34 6. Aarons GA, Palinkas LA. Implementation of evidence-based practice in child welfare:  
35 Service provider perspectives. Adm Policy Ment Health. 2007;34(4):411-419.  
36  
37  
38 7. Aarons GA. Transformational and Transactional Leadership: Association With Attitudes  
39 Toward Evidence-Based Practice. Psychiatr Serv. 2006;57(8):1162-1169.  
40  
41  
42 8. Asgary-Eden V, Lee CM. So now we've picked an evidence-based program, what's next?  
43 Perspectives of service providers and administrators. Professional Psychology: Research  
44 and Practice. 2011;42(2):169.  
45  
46  
47  
48  
49  
50  
51  
52  
53  
54  
55  
56  
57  
58  
59  
60  
61  
62  
63  
64  
65

- 1  
2  
3  
4 9. Asgary-Eden V, Lee CM. Implementing an Evidence-Based Parenting Program in  
5  
6 Community Agencies: What Helps and What Gets in the Way? *Adm Policy Ment Health*.  
7  
8 2011;39(6):1-11.  
9
- 10 10. Barwick MA, Peters J, Boydell K. Getting to uptake: Do communities of practice support  
11  
12 the implementation of evidence-based practice? *J Can Acad Child Adolesc Psychiatry*.  
13  
14 2009;18(1):16-29.  
15  
16
- 17 11. Beidas R, Edmonds J, Marcus S, Kendall P. An RCT of Training and Consultation as  
18  
19 Implementation Strategies for an Empirically Supported Treatment. *Psychiatr Serv*.  
20  
21 2012;4(4):197-206.  
22  
23
- 24 12. Carstens CA, Panzano PC, Massatti R, Roth D, Sweeney HA. A naturalistic study of  
25  
26 MST dissemination in 13 Ohio communities. *J Behav Health Serv Res*. 2009;36(3):344-  
27  
28 360.  
29  
30
- 31 13. Chapman JE, Schoenwald SK. Ethnic Similarity, Therapist Adherence, and Long-Term  
32  
33 Multisystemic Therapy Outcomes. *J Emot Behav Dis*. 2011;19(1):3-16.  
34  
35
- 36 14. Chu BC, Kendall PC. Therapist responsiveness to child engagement: flexibility within  
37  
38 manual-based CBT for anxious youth. *J Clin Psychol*. 2009;65(7):736-754.  
39  
40
- 41 15. Cross AB, Gottfredson DC, Wilson DM, Rorie M, Connell N. Implementation quality  
42  
43 and positive experiences in after-school programs. *Am J of Community Psychol*.  
44  
45 2010;45(3-4):370-380.  
46  
47
- 48 16. Di Noia J, Schwinn TM, Dastur ZA, Schinke SP. The relative efficacy of pamphlets, CD-  
49  
50 ROM, and the Internet for disseminating adolescent drug abuse prevention programs: An  
51  
52 exploratory study. *Prev Med*. 2003;37(6,Pt1):646-653.  
53  
54  
55  
56  
57  
58  
59  
60  
61  
62  
63  
64  
65

- 1  
2  
3  
4 17. Ellis ML, Weiss B, Han S, Gallop R. The influence of parental factors on therapist  
5 adherence in multi-systemic therapy. *J Abnorm Child Psychol.* 2010;38(6):857-868.  
6  
7
- 8  
9 18. Ennett S, Haws S, Ringwalt C, et al. Evidence-based practice in school substance use  
10 prevention: fidelity of implementation under real-world conditions. *Health Educ Res.*  
11  
12 2011;26(2):361.  
13  
14
- 15  
16 19. Epstein JN, Rabiner D, Johnson DE, et al. Improving attention-deficit/hyperactivity  
17 disorder treatment outcomes through use of a collaborative consultation treatment service  
18 by community-based pediatricians: a cluster randomized trial. *Arch Pediatr Adolesc Med.*  
19  
20 2007;161(9):835-840.  
21  
22
- 23  
24 20. Epstein JN, Langberg JM, Lichtenstein PK, Mainwaring BA, Luzader CP, Stark LJ.  
25  
26 Community-wide intervention to improve the attention-deficit/hyperactivity disorder  
27 assessment and treatment practices of community physicians. *Pediatrics.* 2008;122(1):19-  
28  
29 27.  
30  
31
- 32  
33 21. Fagen MC, Flay BR. Sustaining a school-based prevention program: results from the  
34  
35 Aban Aya Sustainability Project. *Health Educ Behav.* 2009;36(1):9-23.  
36  
37
- 38  
39 22. Foster KA, Stiffman AR. Child welfare workers' adoption of decision support  
40  
41 technology. *J Technol Hum Serv.* 2009;27(2):106-126.  
42  
43
- 44  
45 23. Garner BR, Godley SH, Bair CM. The impact of pay-for-performance on therapists'  
46  
47 intentions to deliver high-quality treatment. *J Subst Abuse Treat.* 2011;41(1):97-103.  
48  
49
- 50  
51 24. Glisson C, Schoenwald SK, Hemmelgarn A, et al. Randomized trial of MST and ARC in  
52  
53 a two-level evidence-based treatment implementation strategy. *J Consult Clin Psychol.*  
54  
55 2010;78(4):537-550.  
56  
57  
58  
59  
60  
61  
62  
63  
64  
65

- 1  
2  
3  
4 25. Glisson C, Schoenwald SK, Kelleher K, et al. Therapist turnover and new program  
5 sustainability in mental health clinics as a function of organizational culture, climate, and  
6 service structure. *Adm Policy Ment Health*. 2008;35(1-2):124-133.  
7  
8  
9
- 10  
11 26. Goldberg Lillehoj CJ, Griffin KW, Spoth R. Program provider and observer ratings of  
12 school-based preventive intervention implementation: agreement and relation to youth  
13 outcomes. *Health Educ Behav*. 2004;31(2):242-257.  
14  
15  
16
- 17  
18 27. Hamilton J, Daleiden E, Dopson S. Implementing evidence-based practices for youth in  
19 an HMO: the roles of external ratings and market share. *Adm Policy Ment Health*.  
20 2011;38(3):203-210.  
21  
22  
23
- 24  
25 28. Hanbury A, Wallace LM, Clark M. Multiple outcome measures and mixed methods for  
26 evaluating the effectiveness of theory-based behaviour-change interventions: a case study  
27 targeting health professionals' adoption of a national suicide prevention guideline.  
28  
29  
30  
31  
32  
33  
34  
35  
36  
37  
38  
39  
40  
41  
42  
43  
44  
45  
46  
47  
48  
49  
50  
51  
52  
53  
54  
55  
56  
57  
58  
59  
60  
61  
62  
63  
64  
65
29. Henderson JL, MacKay S, Peterson-Badali M. Closing the Research-Practice Gap:  
Factors Affecting Adoption and Implementation of a Children's Mental Health Program.  
*J Clin Child Adolesc Psychol*. 2006;35(1):2-12.
30. Henderson CE, Taxman FS, Young DW. A Rasch model analysis of evidence-based  
treatment practices used in the criminal justice system. *Drug Alcohol Depend*. 2008;93(1-  
2):163-175.
31. Henderson CE, Young DW, Farrell J, Taxman FS. Associations among state and local  
organizational contexts: Use of evidence-based practices in the criminal justice system.  
*Drug Alcohol Depend*. 2009;103:S23-32.

- 1  
2  
3  
4 32. Henderson JL, Mackay S, Peterson-Badali M. Interdisciplinary knowledge translation:  
5 lessons learned from a mental health: fire service collaboration. *Am J of Community*  
6 *Psychol.* 2010;46(3-4):277-288.  
7  
8  
9  
10  
11 33. Henggeler SW, Melton GB, Brondino MJ, Scherer DG, Hanley JH. Multisystemic  
12 therapy with violent and chronic juvenile offenders and their families: the role of  
13 treatment fidelity in successful dissemination. *J Consult Clin Psychol.* 1997;65(5):821-  
14 833.  
15  
16  
17  
18  
19  
20  
21 34. Henggeler SW, Schoenwald SK, Liao JG, Letourneau EJ, Edwards DL. Transporting  
22 efficacious treatments to field settings: The link between supervisory practices and  
23 therapist fidelity in MST programs. *J Clin Child Adolesc Psychol.* 2002;31(2):155-167.  
24  
25  
26  
27  
28  
29 35. Henggeler SW, Sheidow AJ, Cunningham PB, Donohue BC, Ford JD. Promoting the  
30 implementation of an evidence-based intervention for adolescent marijuana abuse in  
31 community settings: Testing the use of intensive quality assurance. *J Clin Child Adolesc*  
32 *Psychol.* 2008;37(3):682-689.  
33  
34  
35  
36  
37  
38 36. Henggeler SW, Chapman JE, Rowland MD, et al. Statewide adoption and initial  
39 implementation of contingency management for substance-abusing adolescents. *J Consult*  
40 *Clin Psychol.* 2008;76(4):556-567.  
41  
42  
43  
44  
45 37. Herschell AD, McNeil CB, Urquiza AJ, et al. Evaluation of a treatment manual and  
46 workshops for disseminating, parent-child interaction therapy. *Adm Policy Ment Health.*  
47 2009;36(1):63-81.  
48  
49  
50  
51  
52  
53 38. Hoagwood KE, Kelleher K, Murray LK, Jensen PS. Implementation of evidence-based  
54 practices for children in four countries: a project of the World Psychiatric Association.  
55 *Rev Bras Psiquiatr.* 2006;28(1):59-66.  
56  
57  
58  
59  
60  
61  
62  
63  
64  
65

- 1  
2  
3  
4 39. Holth P, Torsheim T, Sheidow AJ, Ogden T, Henggeler SW. Intensive Quality Assurance  
5 of Therapist Adherence to Behavioral Interventions for Adolescent Substance Use  
6 Problems. *J Child Adolesc Subst Abuse*. 2011;20(4):289-313.  
7  
8  
9  
10  
11 40. Jensen-Doss A, Hawley KM, Lopez M, Osterberg LD. Using evidence-based treatments:  
12 The experiences of youth providers working under a mandate. *Professional Psychology:*  
13 *Research and Practice*. 2009;40(4):417-424.  
14  
15  
16  
17  
18 41. Kam CM, Greenberg MT, Walls CT. Examining the role of implementation quality in  
19 school-based prevention using the PATHS curriculum. *Promoting Alternative THinking*  
20 *Skills Curriculum*. *Prev Sci*. 2003;4(1):55-63.  
21  
22  
23  
24  
25 42. Klimes-Dougan B, August GJ, Lee C-YS, et al. Practitioner and site characteristics that  
26 relate to fidelity of implementation: The Early Risers prevention program in a going-to-  
27 scale intervention trial. *Professional Psychology: Research and Practice*. 2009;40(5):467-  
28 475.  
29  
30  
31  
32  
33  
34  
35 43. Kolko DJ, Baumann BL, Herschell AD, Hart JA, Holden EA, Wisniewski SR.  
36 Implementation of AF-CBT by Community Practitioners Serving Child Welfare and  
37 Mental Health: A Randomized Trial. *Child Maltreat*. 2012;17(1):32-46.  
38  
39  
40  
41  
42 44. Langley AK, Nadeem E, Kataoka SH, Stein BD, Jaycox LH. Evidence-based mental  
43 health programs in schools: Barriers and facilitators of successful implementation. *School*  
44 *Mental Health*. 2010;2(3):105-113.  
45  
46  
47  
48  
49 45. Leslie LK, Weckerly J, Plemmons D, Landsverk J, Eastman S. Implementing the  
50 American Academy of Pediatrics Attention-Deficit/Hyperactivity Disorder Diagnostic  
51 Guidelines in primary care settings. *Pediatrics*. 2004;114(1):129-140.  
52  
53  
54  
55  
56  
57  
58  
59  
60  
61  
62  
63  
64  
65

- 1  
2  
3  
4 46. Liddle HA, Rowe CL, Gonzalez A, Henderson CE, Dakof GA, Greenbaum PE. Changing  
5 provider practices, program environment, and improving outcomes by transporting  
6 multidimensional family therapy to an adolescent drug treatment setting. *Am J Addict.*  
7 2006;15 Suppl 1:102-112.  
8  
9  
10  
11  
12  
13  
14 47. Lochman JE, Boxmeyer C, Powell N, Qu L, Wells K, Windle M. Dissemination of the  
15 Coping Power program: importance of intensity of counselor training. *J Consult Clin*  
16 *Psychol.* 2009;77(3):397-409.  
17  
18  
19  
20  
21 48. McBride N, Farrington F, Midford R. Implementing a school drug education  
22 programme: reflections on fidelity. *International Journal of Health Promotion and*  
23 *Education.* 2002;40(2):40-50.  
24  
25  
26  
27  
28 49. Olson BG, Rosenbaum PF, Dosa NP, Roizen NJ. Improving guideline adherence for the  
29 diagnosis of ADHD in an ambulatory pediatric setting. *Ambul Pediatr.* 2005;5(3):138-  
30 142.  
31  
32  
33  
34  
35  
36 50. Ozer EJ, Wanis MG, Bazell N. Diffusion of school-based prevention programs in two  
37 urban districts: adaptations, rationales, and suggestions for change. *Prev Sci.*  
38 2010;11(1):42-55.  
39  
40  
41  
42  
43 51. Palinkas LA, Aarons GA. A view from the top: Executive and management challenges in  
44 a statewide implementation of an evidence based practice to reduce child neglect.  
45 *International Journal of Child Health and Human Development.* 2009;2(1):47-55.  
46  
47  
48  
49  
50 52. Palinkas LA, Schoenwald SK, Hoagwood K, Landsverk J, Chorpita BF, Weisz JR. An  
51 ethnographic study of implementation of evidence-based treatments in child mental  
52 health: First steps. *Psychiatr Serv.* 2008;59(7):738-746.  
53  
54  
55  
56  
57  
58  
59  
60  
61  
62  
63  
64  
65

- 1  
2  
3  
4 53. Palinkas LA, Aarons GA, Chorpita BF, Hoagwood K, Landsverk J, Weisz JR. Cultural  
5 exchange and the implementation of evidence-based practices. *Research on Social Work*  
6 *Practice*. 2009;19(5):602-612.  
7  
8  
9  
10  
11 54. Pankratz MM, Hallfors DD. Implementing evidence-based substance use prevention  
12 curricula in North Carolina public school districts. *J Sch Health*. 2004;74(9):353-358.  
13  
14  
15 55. Pankratz MM, Jackson-Newsom J, Giles SM, Ringwalt CL, Bliss K, Bell M.  
16  
17 Implementation fidelity in a teacher-led alcohol use prevention curriculum. *J Drug Educ*.  
18  
19 2006;36(4):317-333.  
20  
21  
22  
23 56. Pentz MA, Trebow EA, Hansen WB, MacKinnon DP, et al. Effects of program  
24 implementation on adolescent drug use behavior: The Midwestern Prevention Project  
25  
26 (MPP). *Eval Rev*. 1990;14(3):264-289.  
27  
28  
29  
30 57. Riley KJ, Rieckmann T, McCarty D. Implementation of MET/CBT 5 for Adolescents. *J*  
31  
32 *Behav Health Serv Res*. 2008;35(3):304-314.  
33  
34  
35 58. Robbins MS, Feaster DJ, Horigian VE, Puccinelli MJ, Henderson C, Szapocznik J.  
36  
37 Therapist adherence in brief strategic family therapy for adolescent drug abusers. *J*  
38  
39 *Consult Clin Psychol*. 2011;79(1):43-53.  
40  
41  
42 59. Roberts-Gray C, Gingiss PM, Boerm M. Evaluating school capacity to implement new  
43  
44 programs. *Eval Program Plann*. 2007;30(3):247-257.  
45  
46  
47 60. Rohrbach LA, Graham JW, Hansen WB. Diffusion of a school-based substance abuse  
48  
49 prevention program: predictors of program implementation. *Prev Med*. 1993;22(2):237-  
50  
51 260.  
52  
53  
54  
55  
56  
57  
58  
59  
60  
61  
62  
63  
64  
65



- 1  
2  
3  
4 61. Rohrbach LA, Ringwalt CL, Ennett ST, Vincus AA. Factors associated with adoption of  
5 evidence-based substance use prevention curricula in US school districts. *Health Educ*  
6  
7  
8  
9 *Res.* 2005;20(5):514-526.  
10  
11 62. Sanders MR, Prinz RJ, Shapiro CJ. Predicting utilization of evidence-based parenting  
12 interventions with organizational, service-provider and client variables. *Adm Policy Ment*  
13  
14  
15  
16  
17 *Health.* 2009;36(2):133-143.  
18  
19 63. Schoenwald SK, Sheidow AJ, Letourneau EJ, Liao JG. Transportability of multisystemic  
20 therapy: evidence for multilevel influences. *Ment Health Serv Res.* 2003;5(4):223-239.  
21  
22  
23 64. Schoenwald SK, Letourneau EJ, Halliday-Boykins C. Predicting therapist adherence to a  
24 transported family-based treatment for youth. *J Clin Child Adolesc Psychol.*  
25  
26  
27  
28  
29  
30 2005;34(4):658-670.  
31  
32 65. Schoenwald SK, Carter RE, Chapman JE, Sheidow AJ. Therapist adherence and  
33 organizational effects on change in youth behavior problems one year after multisystemic  
34 therapy. *Adm Policy Ment Health.* 2008;35(5):379-394.  
35  
36  
37  
38 66. Schoenwald SK, Chapman JE, Kelleher K, et al. A survey of the infrastructure for  
39 children's mental health services: implications for the implementation of empirically  
40  
41  
42  
43  
44 supported treatments (ESTs). *Adm Policy Ment Health.* 2008;35(1-2):84-97.  
45  
46 67. Schoenwald SK, Sheidow AJ, Chapman JE. Clinical supervision in treatment transport:  
47 effects on adherence and outcomes. *J Consult Clin Psychol.* 2009;77(3):410-421.  
48  
49  
50 68. Schoenwald SK, Chapman JE, Henry DB, Sheidow AJ. Taking Effective Treatments to  
51  
52  
53  
54  
55  
56  
57  
58  
59  
60  
61  
62  
63  
64  
65

- 1  
2  
3  
4 69. Shapiro CJ, Prinz RJ, Sanders MR. Facilitators and Barriers to Implementation of an  
5  
6 Evidence-Based Parenting Intervention to Prevent Child Maltreatment: The Triple P-  
7  
8 Positive Parenting Program. *Child Maltreat*. 2011;17(1):86-95.  
9  
10  
11 70. Stevens J, Kelleher KJ, Wang W, Schoenwald SK, Hoagwood KE, Landsverk J. Use of  
12  
13 psychotropic medication guidelines at child-serving community mental health centers as  
14  
15 assessed by clinic directors. *Community Ment Health J*. 2011;47(3):361-363.  
16  
17  
18 71. Thaker S, Steckler A, Sanchez V, Khatapoush S, Rose J, Hallfors DD. Program  
19  
20 characteristics and organizational factors affecting the implementation of a school-based  
21  
22 indicated prevention program. *Health Educ Res*. 2008;23(2):238-248.  
23  
24  
25 72. Turner KMT, Nicholson JM, Sanders MR. The role of practitioner self-efficacy, training,  
26  
27 program and workplace factors on the implementation of an evidence-based parenting  
28  
29 intervention in primary care. *J Prim Prev*. 2011:1-18.  
30  
31  
32 73. Vismara LA, Young GS, Stahmer AC, Griffith EM, Rogers SJ. Dissemination of  
33  
34 evidence-based practice: can we train therapists from a distance? *J Autism Dev Disord*.  
35  
36 2009;39(12):1636-1651.  
37  
38  
39 74. Zazzali JL, Sherbourne C, Hoagwood KE, Greene D, Bigley MF, Sexton TL. The  
40  
41 adoption and implementation of an evidence based practice in child and family mental  
42  
43 health services organizations: A pilot study of functional family therapy in New York  
44  
45 State. *Adm Policy Ment Health*. 2008;35(1-2):38-49.  
46  
47  
48  
49  
50  
51  
52  
53  
54  
55  
56  
57  
58  
59  
60  
61  
62  
63  
64  
65
